# Supplementary material
Source: HighWire-hosted journal article supplement (https://www.cmajopen.ca/highwire/filestream/81233/field_highwire_adjunct_files/1/2018-0148-2-at.pdf)
Supplement: 2018-0148-2-at.pdf [file 2018-0148-2-at.pdf]

## Appendix 2 (as supplied by the authors): Administrative Codes used to derive study outcomes

### A. International Classification of Diseases for Oncology Version 3 Cancer Topography Codes (used to identify cancer site)

|            |                                                                                                                                                                                                                                                                                                                                                                                                                                                                                                                                                                                                                                                                                                                                                                                                     |
|------------|-----------------------------------------------------------------------------------------------------------------------------------------------------------------------------------------------------------------------------------------------------------------------------------------------------------------------------------------------------------------------------------------------------------------------------------------------------------------------------------------------------------------------------------------------------------------------------------------------------------------------------------------------------------------------------------------------------------------------------------------------------------------------------------------------------|
| Breast     | C500-C506, C508, C509                                                                                                                                                                                                                                                                                                                                                                                                                                                                                                                                                                                                                                                                                                                                                                               |
| Lung       | C340-C343, C348-C349                                                                                                                                                                                                                                                                                                                                                                                                                                                                                                                                                                                                                                                                                                                                                                                |
| Colorectal | C180-C189, C199, C209                                                                                                                                                                                                                                                                                                                                                                                                                                                                                                                                                                                                                                                                                                                                                                               |
| Prostate   | C619                                                                                                                                                                                                                                                                                                                                                                                                                                                                                                                                                                                                                                                                                                                                                                                                |
| Other      | C000-C006, C008-C009, C019-C024, C028-C031, C039-C041, C048-C052, C058-C062, C068-C069, C079-C081, C088-C091, C098-C103, C108-C113, C118-C119, C129-C132, C138-C140, C148, C150-C155, C158-C166, C168-C173, C178-C179, C210-C212, C218, C220-C221, C239-C241, C248-C254, C257-C260, C268-C269, C300-C301, C310-C313, C318-C323, C328-C329, C339, C379-C384, C390, C398-C403, C408, C410-C414, C418-C424, C440-C449, C470-C476, C478-C482, C488, C490-C496, C498, C499, C510-C512, C518-C519, C529-C531, C538-C543, C548-C549, C559, C569-C571, C573-C574, C577-C579, C589, C600-C602, C608-C609, C620-C621, C629, C631-C632, C637-C639, C649, C659, C669-C681, C688-C696, C698-C701, C709-C720, C723, C725, C728-C729, C739-C741, C749-C751, C753-C755, C758-C765, C767, C770-C775, C778-C779, C809 |

### B. Indicators of Aggressive End-of-Life Care

|                                                                                       |                                                                                                   |
|---------------------------------------------------------------------------------------|---------------------------------------------------------------------------------------------------|
| Chemotherapy treatment received within the last 14 days before death (OHIP)           | G281, G339, G345, G359, G381<br>days to service date $\leq 0$ and $> -15$                         |
| Admission to an Intensive Care Unit (ICU) within the last 30 days before death (OHIP) | G400, G401, G402, G405, G406, G407, G557, G558, G559<br>days to service date $\leq 0$ and $> -15$ |
| $>1$ Emergency Department (ED) visit within the last 30 days before death (NACRS)     | Source = E<br>days to registration date $\leq 0$ and $> -31$                                      |
| $>1$ Hospitalization within the last 30 days before death (DAD)                       | Any code<br>days to admission date $\leq 0$ and $> -31$                                           |
| Death in Acute Care Hospital (DAD)                                                    | Discharge Disposition = 7                                                                         |

### C. Palliative Designation

#### Palliative Designation Codes

OHIP: A945, C945, K023, G512, K023, B998, C122, C123, C882, C982, W882, W982, W872, W972, K121, K700, K374, K735, A180, G511

Home Care Database: service\_rpc=94 or 95

DAD: Z51.5
